# Supplementary material for: Recon 2.2: from reconstruction to model of human metabolism
Source: PubMed Central journal article supplement (PMC4896983; doi:10.1007/s11306-016-1051-4), 2016-06-07
Supplement: 11306_2016_1051_MOESM2_ESM.pdf [file 11306_2016_1051_MOESM2_ESM.pdf]

**Supplementary Information Table S1:** Redefined reactions of oxidative phosphorylation. The fundamental change is in the redefining of the protons as being in the intramembrane space, where previously these were represented simply as cytosolic protons. Changes include those to respiratory chain reactions and the aspartate-glutamate shuttle, all of which involve the transport of intramembrane protons. Abbreviations: q10 (coenzyme Q10), q10h2 (ubiquinol-10), ficytC (ferricytochrome C), focytC (ferrocycytochrome C), glu\_L (L-glutamate), asp\_L (L-aspartate), [m] (mitochondrion), [i] (mitochondrial intramembrane space), [c] (cytoplasm)

| Reaction id | Reaction name                                   | Reaction definition                                                                                                         |
|-------------|-------------------------------------------------|-----------------------------------------------------------------------------------------------------------------------------|
| NADH2_u10m  | NADH dehydrogenase, mitochondrial               | $5 \text{ h[m]} + \text{ nadh[m]} + \text{ q10[m]} \rightarrow \text{ nad[m]} + 4 \text{ h[i]} + \text{ q10h2[m]}$          |
| CYOR_u10m   | ubiquinol-6 cytochrome c reductase, Complex III | $2 \text{ ficytC[m]} + 2 \text{ h[m]} + \text{ q10h2[m]} \rightarrow 2 \text{ focytC[m]} + 4 \text{ h[i]} + \text{ q10[m]}$ |
| CYOOm3      | cytochrome c oxidase, mitochondrial Complex IV  | $4 \text{ focytC[m]} + 8 \text{ h[m]} + \text{ o2[m]} \rightarrow 4 \text{ ficytC[m]} + 2 \text{ h2o[m]} + 4 \text{ h[i]}$  |
| ATPS4m      | ATP synthase (four protons for one ATP)         | $\text{ adp[m]} + \text{ pi[m]} + 4 \text{ h[i]} \rightarrow \text{ atp[m]} + \text{ h2o[m]} + 3 \text{ h[m]}$              |
| ASPGLUm     | aspartate-glutamate mitochondrial shuttle       | $\text{ h[i]} + \text{ glu\_L[c]} + \text{ asp\_L[m]} \rightarrow \text{ h[m]} + \text{ glu\_L[m]} + \text{ asp\_L[c]}$     |

**Supplementary Information Table S2:** Predicted maximum ATP yields on different amino acid carbon sources under aerobic conditions.

|               | ATP yield |
|---------------|-----------|
| Carbon source | Recon 2.2 |
| Ala           | 15        |
| Arg           | 27.5      |
| Asn           | 15        |

|     |      |
|-----|------|
| Asp | 15   |
| Cys | 17.5 |
| Gln | 22.5 |
| Glu | 22.5 |
| Gly | 8    |
| His | 25.5 |
| Ile | 35.5 |
| Leu | 33.5 |
| Lys | 32   |
| Met | 27   |
| Phe | 33   |
| Pro | 27.5 |
| Ser | 13.5 |
| Thr | 19   |
| Trp | 39.5 |
| Tyr | 35.5 |
| Val | 29   |
